# Supplementary material
Source: Springer Nature journal article supplement (https://www.springermedizin.de/resource/supplementary/13037_2013_169_MOESM2_ESM.pdf/9659466)

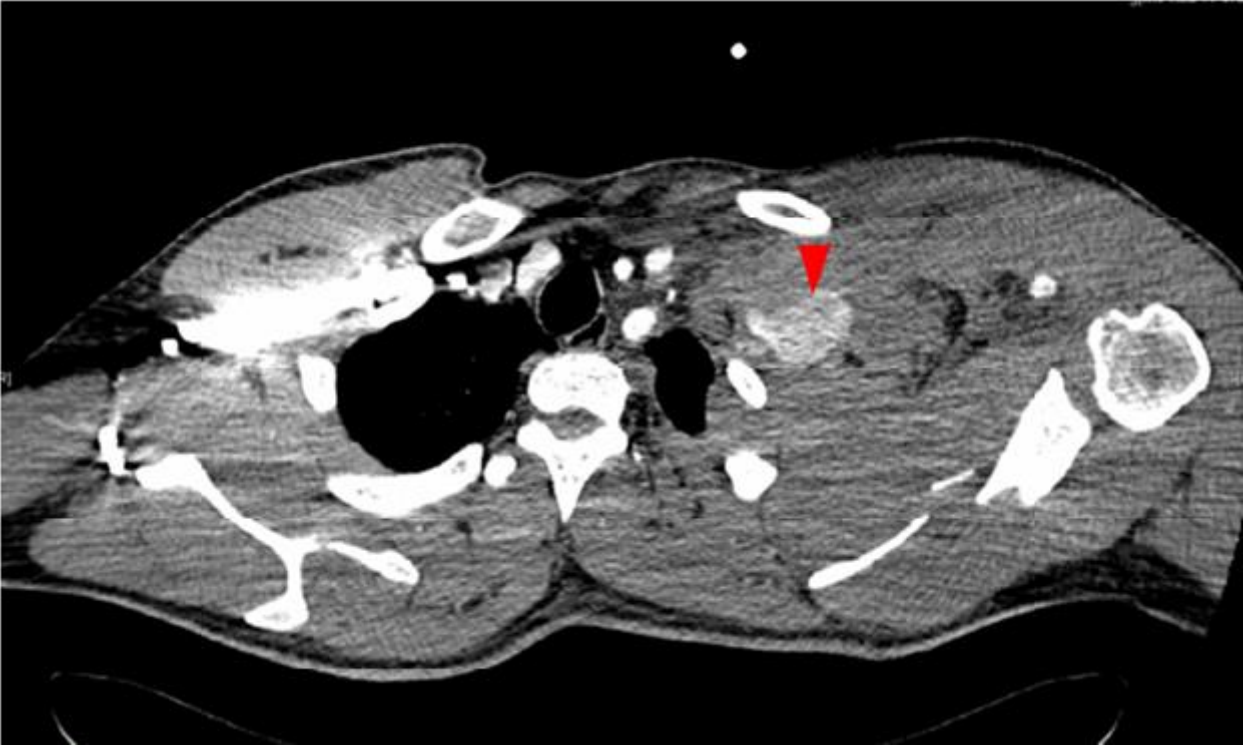

Supplement: MOESM2 [file 9659466]
